# Supplementary material
Source: PubMed Central journal article supplement (PMC4896325)
Supplement: eAppendixA.pdf [file eAppendixA.pdf]

# Survey on Adjustment and Quality of Life

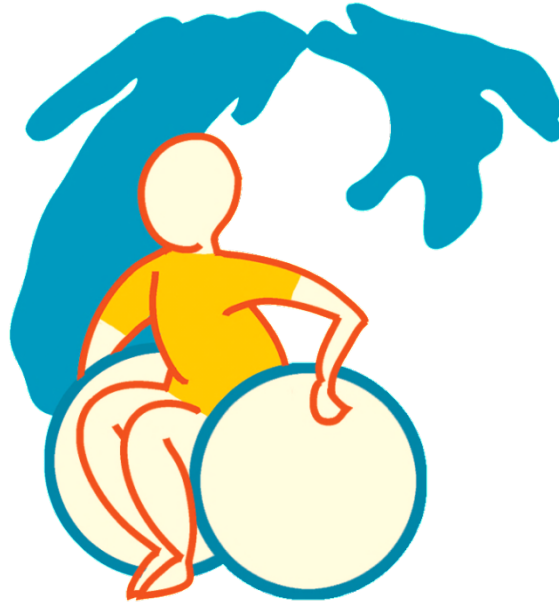

## Great Lakes SCI Collaborative

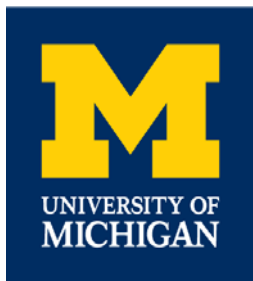

**DMC**  
Rehabilitation Institute  
of Michigan  
*always there.*

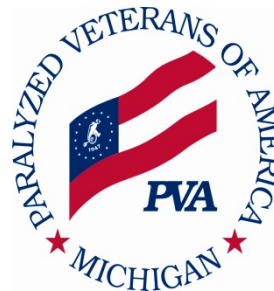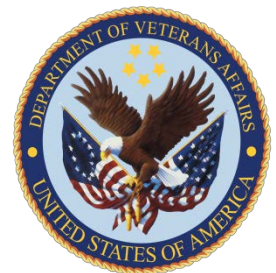

THIS STUDY IS APPROVED BY THE ANN ARBOR DEPARTMENT OF VETERANS  
AFFAIRS HEALTHCARE SYSTEM



8. Do you currently have health insurance?

<sup>1</sup> Yes  <sup>2</sup> No

What kind of health insurance do you have? Check all that apply:

- |                                                                          |                                                               |
|--------------------------------------------------------------------------|---------------------------------------------------------------|
| <input type="checkbox"/> <sup>1</sup> Employer health plan               | <input type="checkbox"/> <sup>5</sup> Veterans Administration |
| <input type="checkbox"/> <sup>2</sup> Individual health insurance policy | <input type="checkbox"/> <sup>6</sup> Auto Insurance          |
| <input type="checkbox"/> <sup>3</sup> Medicaid                           | <input type="checkbox"/> <sup>7</sup> Don't know / not sure   |
| <input type="checkbox"/> <sup>4</sup> Medicare                           | <input type="checkbox"/> <sup>8</sup> Other: _____            |

9. In general, would you say that your health is:

<sup>1</sup> Poor      <sup>2</sup> Fair      <sup>3</sup> Good      <sup>4</sup> Very Good      <sup>5</sup> Excellent

10. Has there been a time in the last 12 months when you needed medical care but were not able to get it?

<sup>1</sup> Yes  <sup>2</sup> No

What was the primary reason that you did not receive the medical care you needed?

Check one only:

- <sup>1</sup> Transportation
- <sup>2</sup> Unable to afford care
- <sup>3</sup> Unable to locate a health care provider
- <sup>4</sup> Unable to get an appointment in a timely fashion
- <sup>5</sup> Other: \_\_\_\_\_

11. Have you experienced any of the following problems within the past 12 months?

Check all that apply:

- <sup>1</sup> Pressure sores / skin breakdown
- <sup>2</sup> Bladder problems, including frequent urinary tract infections (UTIs) or urinary accidents
- <sup>3</sup> Bowel problems, including chronic constipation or frequent bowel accidents
- <sup>4</sup> Problems managing blood pressure, including high blood pressure, low blood pressure and / or autonomic dysreflexia
- <sup>5</sup> Persistent, chronic pain
- <sup>6</sup> Emotional issues, including feelings of depression or anxiety
- <sup>7</sup> Respiratory issues, including pneumonia
- <sup>8</sup> Sleep-related breathing problems
- <sup>9</sup> Other: \_\_\_\_\_

### Section III: Quality of Life

12. Generally speaking, how would you describe yourself as being happy?

- <sup>1</sup> All the time     
 <sup>2</sup> Most of the Time     
 <sup>3</sup> Some of the time  
<sup>4</sup> Very Infrequently     
 <sup>5</sup> Not at All

13. When you compare yourselves with other people you know, would you say you are:

- <sup>1</sup> Better Off     
 <sup>2</sup> Worse Off     
 <sup>3</sup> About the same

14. Below are 8 statements with which you may agree or disagree. Using the 1 to 7 scale below, indicate your agreement with each item by checking the response for each statement.

|                                                                        | Strongly disagree                     | Disagree                              | Slightly disagree                     | Neither agree nor disagree            | Slightly agree                        | Agree                                 | Strongly agree                        |
|------------------------------------------------------------------------|---------------------------------------|---------------------------------------|---------------------------------------|---------------------------------------|---------------------------------------|---------------------------------------|---------------------------------------|
| I lead a purposeful and meaningful life.                               | <input type="checkbox"/> <sup>1</sup> | <input type="checkbox"/> <sup>2</sup> | <input type="checkbox"/> <sup>3</sup> | <input type="checkbox"/> <sup>4</sup> | <input type="checkbox"/> <sup>5</sup> | <input type="checkbox"/> <sup>6</sup> | <input type="checkbox"/> <sup>7</sup> |
| My social relationships are supportive and rewarding.                  | <input type="checkbox"/> <sup>1</sup> | <input type="checkbox"/> <sup>2</sup> | <input type="checkbox"/> <sup>3</sup> | <input type="checkbox"/> <sup>4</sup> | <input type="checkbox"/> <sup>5</sup> | <input type="checkbox"/> <sup>6</sup> | <input type="checkbox"/> <sup>7</sup> |
| I am engaged and interested in daily activities.                       | <input type="checkbox"/> <sup>1</sup> | <input type="checkbox"/> <sup>2</sup> | <input type="checkbox"/> <sup>3</sup> | <input type="checkbox"/> <sup>4</sup> | <input type="checkbox"/> <sup>5</sup> | <input type="checkbox"/> <sup>6</sup> | <input type="checkbox"/> <sup>7</sup> |
| I actively contribute to the happiness and well-being of others.       | <input type="checkbox"/> <sup>1</sup> | <input type="checkbox"/> <sup>2</sup> | <input type="checkbox"/> <sup>3</sup> | <input type="checkbox"/> <sup>4</sup> | <input type="checkbox"/> <sup>5</sup> | <input type="checkbox"/> <sup>6</sup> | <input type="checkbox"/> <sup>7</sup> |
| I am competent and capable in the activities that are important to me. | <input type="checkbox"/> <sup>1</sup> | <input type="checkbox"/> <sup>2</sup> | <input type="checkbox"/> <sup>3</sup> | <input type="checkbox"/> <sup>4</sup> | <input type="checkbox"/> <sup>5</sup> | <input type="checkbox"/> <sup>6</sup> | <input type="checkbox"/> <sup>7</sup> |
| I am a good person and live a good life.                               | <input type="checkbox"/> <sup>1</sup> | <input type="checkbox"/> <sup>2</sup> | <input type="checkbox"/> <sup>3</sup> | <input type="checkbox"/> <sup>4</sup> | <input type="checkbox"/> <sup>5</sup> | <input type="checkbox"/> <sup>6</sup> | <input type="checkbox"/> <sup>7</sup> |
| I am optimistic about my future                                        | <input type="checkbox"/> <sup>1</sup> | <input type="checkbox"/> <sup>2</sup> | <input type="checkbox"/> <sup>3</sup> | <input type="checkbox"/> <sup>4</sup> | <input type="checkbox"/> <sup>5</sup> | <input type="checkbox"/> <sup>6</sup> | <input type="checkbox"/> <sup>7</sup> |
| People respect me.                                                     | <input type="checkbox"/> <sup>1</sup> | <input type="checkbox"/> <sup>2</sup> | <input type="checkbox"/> <sup>3</sup> | <input type="checkbox"/> <sup>4</sup> | <input type="checkbox"/> <sup>5</sup> | <input type="checkbox"/> <sup>6</sup> | <input type="checkbox"/> <sup>7</sup> |

15. Is there anything else you would like to tell us about your resilience or ability to “bounce back” when you face a challenge? \_\_\_\_\_

\_\_\_\_\_

\_\_\_\_\_

\_\_\_\_\_

\_\_\_\_\_

16. Below are five statements with which you may agree or disagree. Using the 1 to 7 scale below, indicate your agreement with each item by checking the box that corresponds to your level of agreement. Please be open and honest in your responding.

|                                                                | Strongly disagree                     | disagree                              | Slightly disagree                     | Neither agree nor disagree            | Slightly agree                        | Agree                                 | Strongly agree                        |
|----------------------------------------------------------------|---------------------------------------|---------------------------------------|---------------------------------------|---------------------------------------|---------------------------------------|---------------------------------------|---------------------------------------|
| a. In most ways my life is close to my ideal.                  | <input type="checkbox"/> <sup>1</sup> | <input type="checkbox"/> <sup>2</sup> | <input type="checkbox"/> <sup>3</sup> | <input type="checkbox"/> <sup>4</sup> | <input type="checkbox"/> <sup>5</sup> | <input type="checkbox"/> <sup>6</sup> | <input type="checkbox"/> <sup>7</sup> |
| b. The conditions of my life are excellent.                    | <input type="checkbox"/> <sup>1</sup> | <input type="checkbox"/> <sup>2</sup> | <input type="checkbox"/> <sup>3</sup> | <input type="checkbox"/> <sup>4</sup> | <input type="checkbox"/> <sup>5</sup> | <input type="checkbox"/> <sup>6</sup> | <input type="checkbox"/> <sup>7</sup> |
| c. I am satisfied with my life.                                | <input type="checkbox"/> <sup>1</sup> | <input type="checkbox"/> <sup>2</sup> | <input type="checkbox"/> <sup>3</sup> | <input type="checkbox"/> <sup>4</sup> | <input type="checkbox"/> <sup>5</sup> | <input type="checkbox"/> <sup>6</sup> | <input type="checkbox"/> <sup>7</sup> |
| d. So far I have gotten the important things I want in life.   | <input type="checkbox"/> <sup>1</sup> | <input type="checkbox"/> <sup>2</sup> | <input type="checkbox"/> <sup>3</sup> | <input type="checkbox"/> <sup>4</sup> | <input type="checkbox"/> <sup>5</sup> | <input type="checkbox"/> <sup>6</sup> | <input type="checkbox"/> <sup>7</sup> |
| e. If I could live my life over, I would change almost nothing | <input type="checkbox"/> <sup>1</sup> | <input type="checkbox"/> <sup>2</sup> | <input type="checkbox"/> <sup>3</sup> | <input type="checkbox"/> <sup>4</sup> | <input type="checkbox"/> <sup>5</sup> | <input type="checkbox"/> <sup>6</sup> | <input type="checkbox"/> <sup>7</sup> |

## Section IV: Demographic Information

17. Gender: <sup>1</sup> Male <sup>2</sup> Female
18. Marital Status: <sup>1</sup> Single <sup>2</sup> Married/Partnered <sup>3</sup> Separated  
<sup>4</sup> Divorced <sup>5</sup> Widowed
19. Have you ever served in the military?  
<sup>1</sup> Yes  <sup>2</sup> No
- a. Did you participate in combat? <sup>1</sup> Yes <sup>2</sup> No
- b. Do you receive Veterans Benefits? <sup>1</sup> Yes <sup>2</sup> No
- c. Do you receive care at a Veterans Affairs Health Facility?  
<sup>1</sup> Yes <sup>2</sup> No
- d. Are you service-connected for your SCI? <sup>1</sup> Yes <sup>2</sup> No
20. How would you describe the area where you live? Check one only:  
<sup>1</sup> Urban <sup>2</sup> Suburban <sup>3</sup> Small Town / Rural
21. What is your highest level of education? Check one only:  
<sup>1</sup> Less than high school <sup>4</sup> Some college / Associates degree  
<sup>2</sup> Some high school <sup>5</sup> Bachelor's degree  
<sup>3</sup> High school / GED <sup>6</sup> Graduate study or degree  
 Other: \_\_\_\_\_
22. What is your race / ethnicity? Check all that apply:  
<sup>1</sup> White <sup>5</sup> Native Hawaiian / Other Pacific Islander  
<sup>2</sup> Black / African-American <sup>6</sup> American Indian, Alaska Native  
<sup>3</sup> Asian <sup>7</sup> Hispanic / Latino  
<sup>4</sup> Middle-Eastern <sup>8</sup> Other: \_\_\_\_\_

If you checked more than one category, please indicate which group best represents your race: <sup>(write in race)</sup>

\_\_\_\_\_

**UPON RETURN, THIS PAGE WILL BE SEPARATED  
AND STORED APART FROM THE REST OF YOUR SURVEY RESPONSES**

23. If eligible, would you be willing to participate in an in-depth interview that will ask about you and the adjustment process that you went through after your SCI? This interview would last about 2 hours and take place at a location that would be convenient for you.

<sup>1</sup> Yes

<sup>2</sup> No

<sup>3</sup> Maybe – tell me more

If you answered **yes** or **maybe**, please provide your name and a contact number or e-mail. This information will be recorded by researchers at the University of Michigan who may use it to contact you for the in-depth interview. Your contact information would only be used to contact you for this follow-up interview, which is identified as a separate study, and not used for any other purpose.

Name: \_\_\_\_\_

Phone number or e-mail: \_\_\_\_\_

**Thank you for completing this  
survey**

**Please return it in the envelope  
provided**
